# Supplementary material for: Self-association of diphenylpnictoginic acids in solution and solid state: covalent vs. hydrogen bonding
Source: Royal Society of Chemistry journal article supplement (doi:10.1039/d2cp00286h), 2022-01-01
Supplement: d2cp00286h2.pdf [file d2cp00286h2.pdf]

## Self-association of diphenylpnictogenic acids in solution and solid state: covalent vs hydrogen bonding

Artyom A. Yakubenko, Aleksandra M. Puzyk, Vladislav O. Korostelev, Valeriia V. Mulloyarova, Elena Yu. Tupikina, Peter M. Tolstoy and Alexander S. Antonov\*

### Supporting Information

|                                                                                                                                                                              |     |
|------------------------------------------------------------------------------------------------------------------------------------------------------------------------------|-----|
| Copies of NMR spectra                                                                                                                                                        | S2  |
| Crystal data and structure refinement for $(\mathbf{8}\cdot\mathbf{H}_2\mathbf{O})_2$ , <b>7-A</b> , <b>7-B</b> , <b>12</b> , <b>6</b>                                       | S11 |
| Crystal data and structure refinement for $\mathbf{8}_2\cdot(\mathbf{4}\text{-MeC}_6\text{H}_5\text{SO}_2\text{NH}_2)_3$ , <b>15</b> , <b>14-A</b> , <b>14-B</b> , <b>17</b> | S12 |

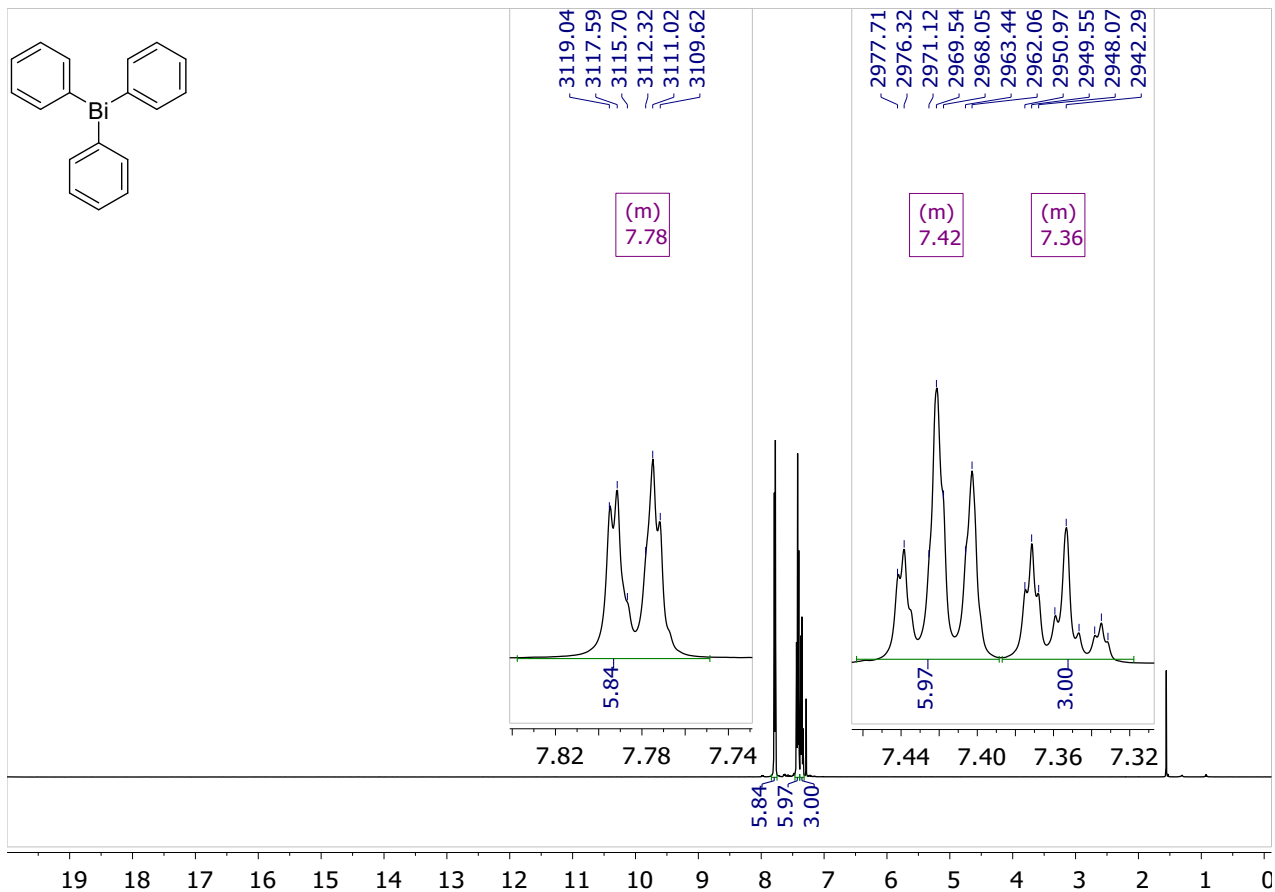

Figure S1:  $^1\text{H}$  NMR spectrum of **2** ( $\text{CDCl}_3$ , 400 MHz).

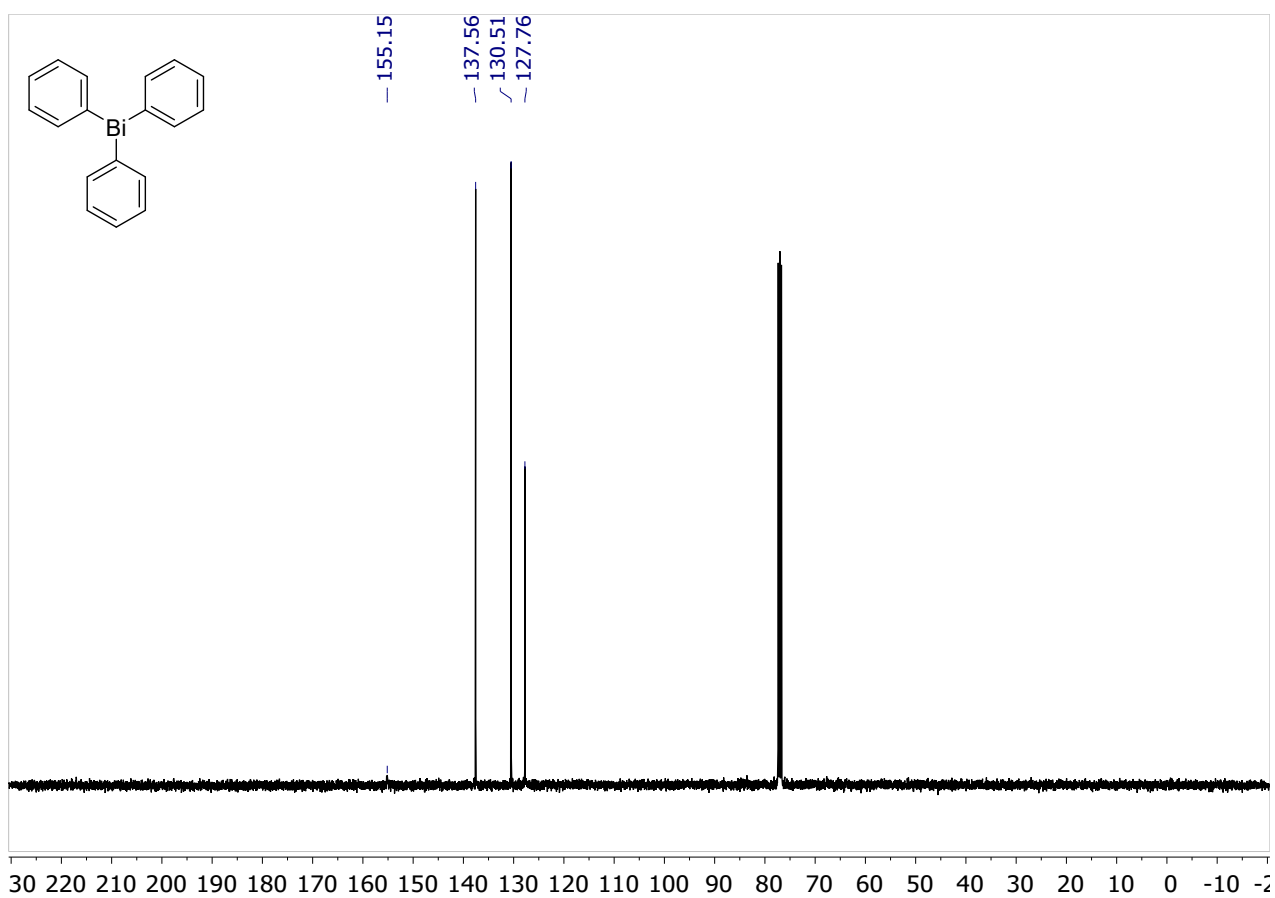

Figure S2:  $^{13}\text{C}\{^1\text{H}\}$  NMR spectrum of **2** ( $\text{CDCl}_3$ , 100 MHz).

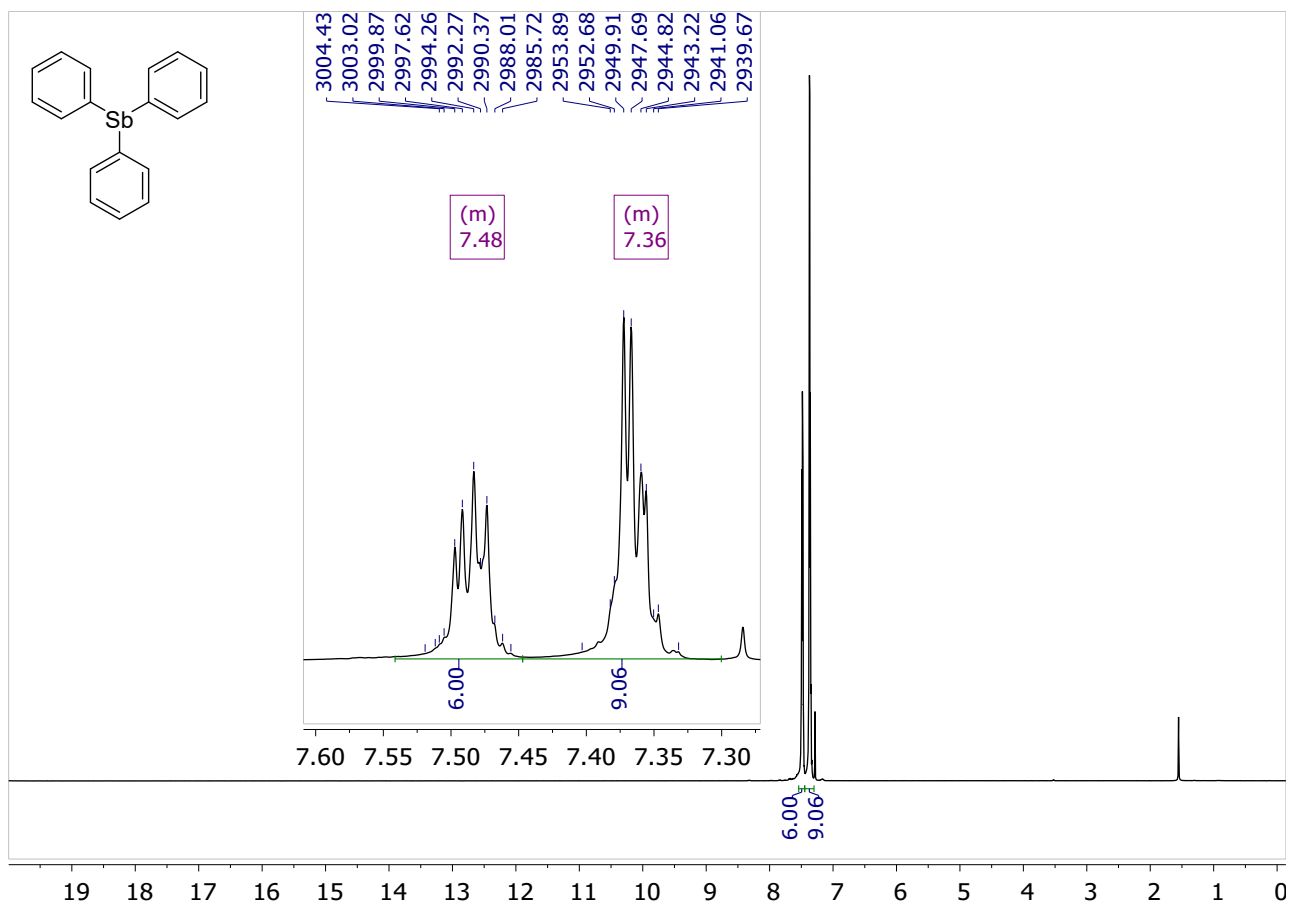

**Figure S3:**  $^1\text{H}$  NMR spectrum of **3** ( $\text{CDCl}_3$ , 400 MHz).

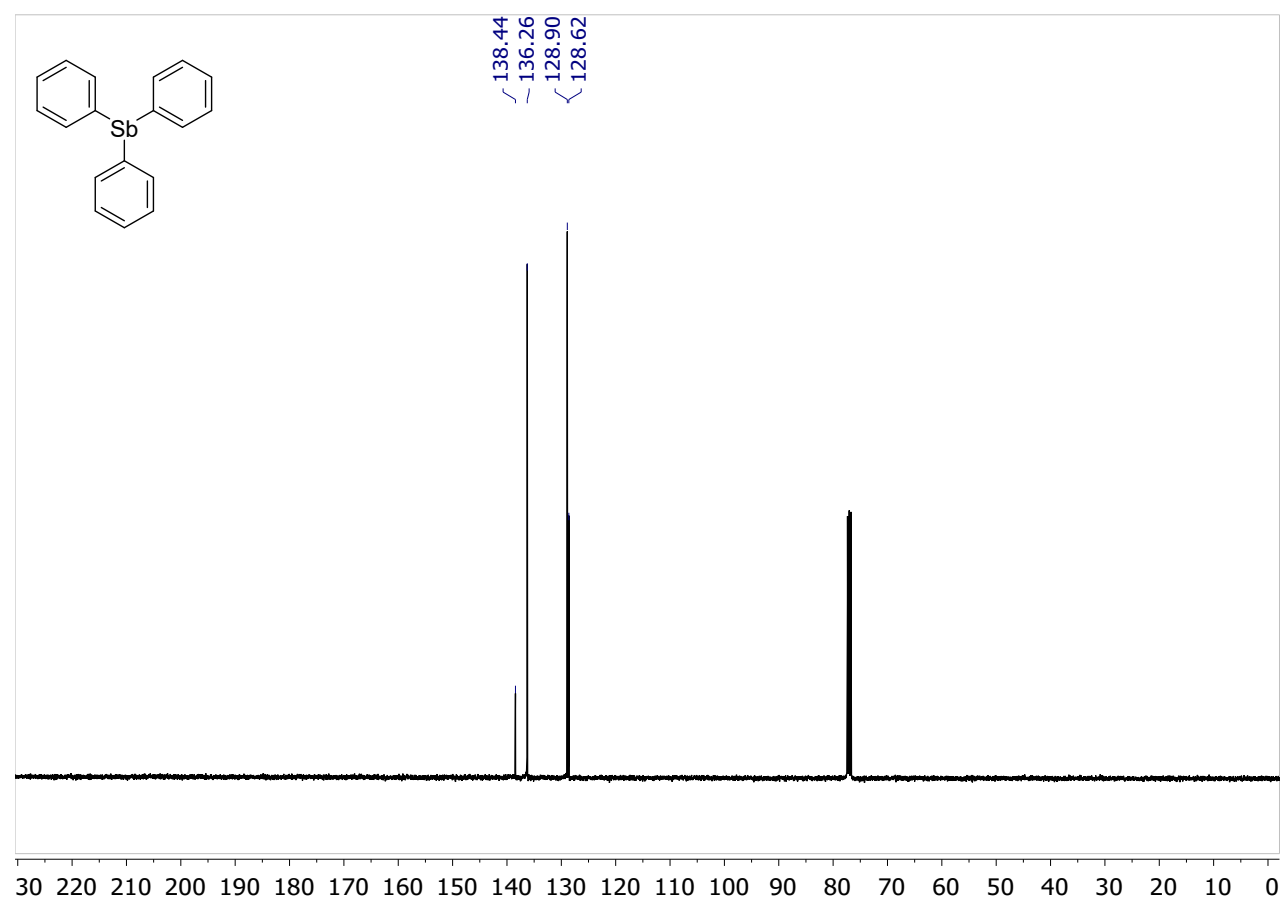

**Figure S4:**  $^{13}\text{C}\{^1\text{H}\}$  NMR spectrum of **3** ( $\text{CDCl}_3$ , 100 MHz).

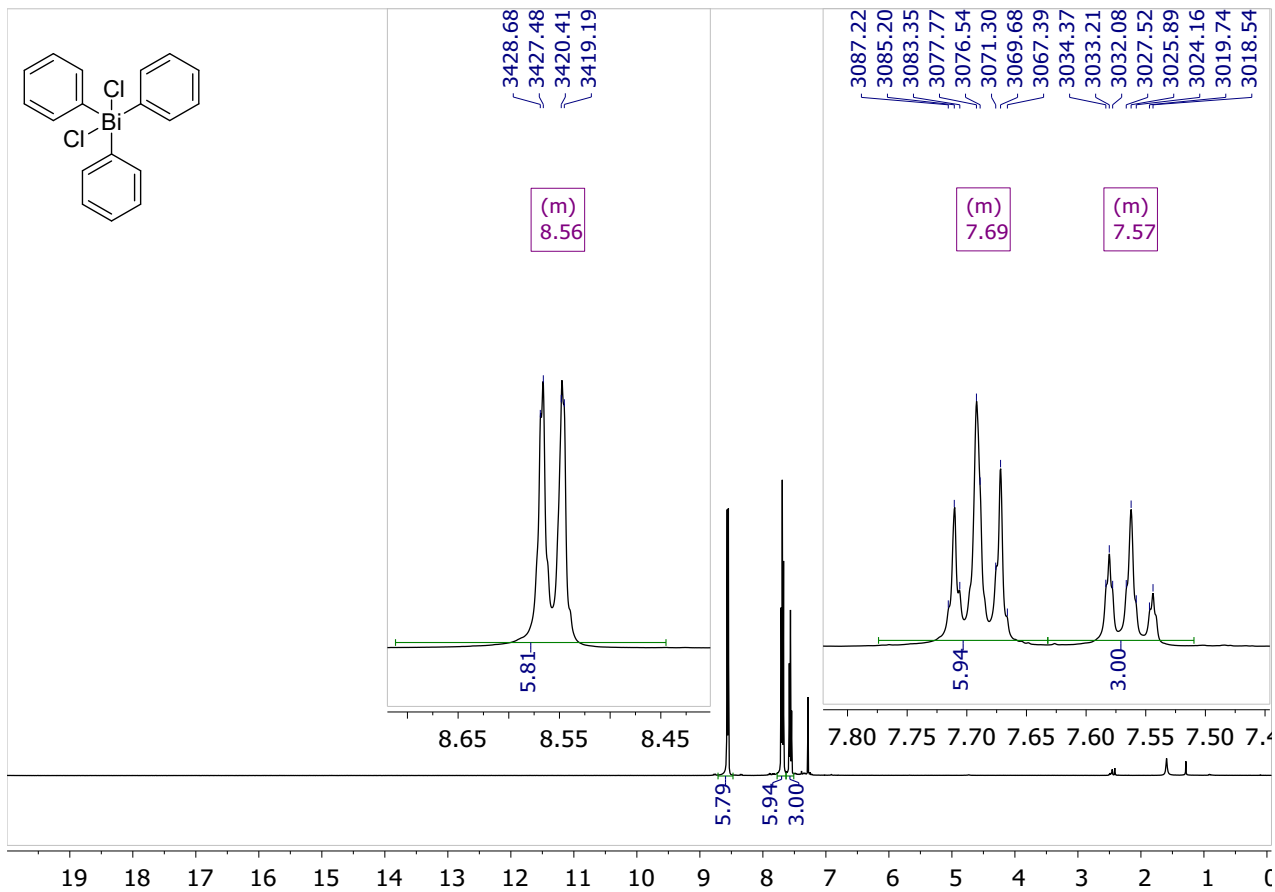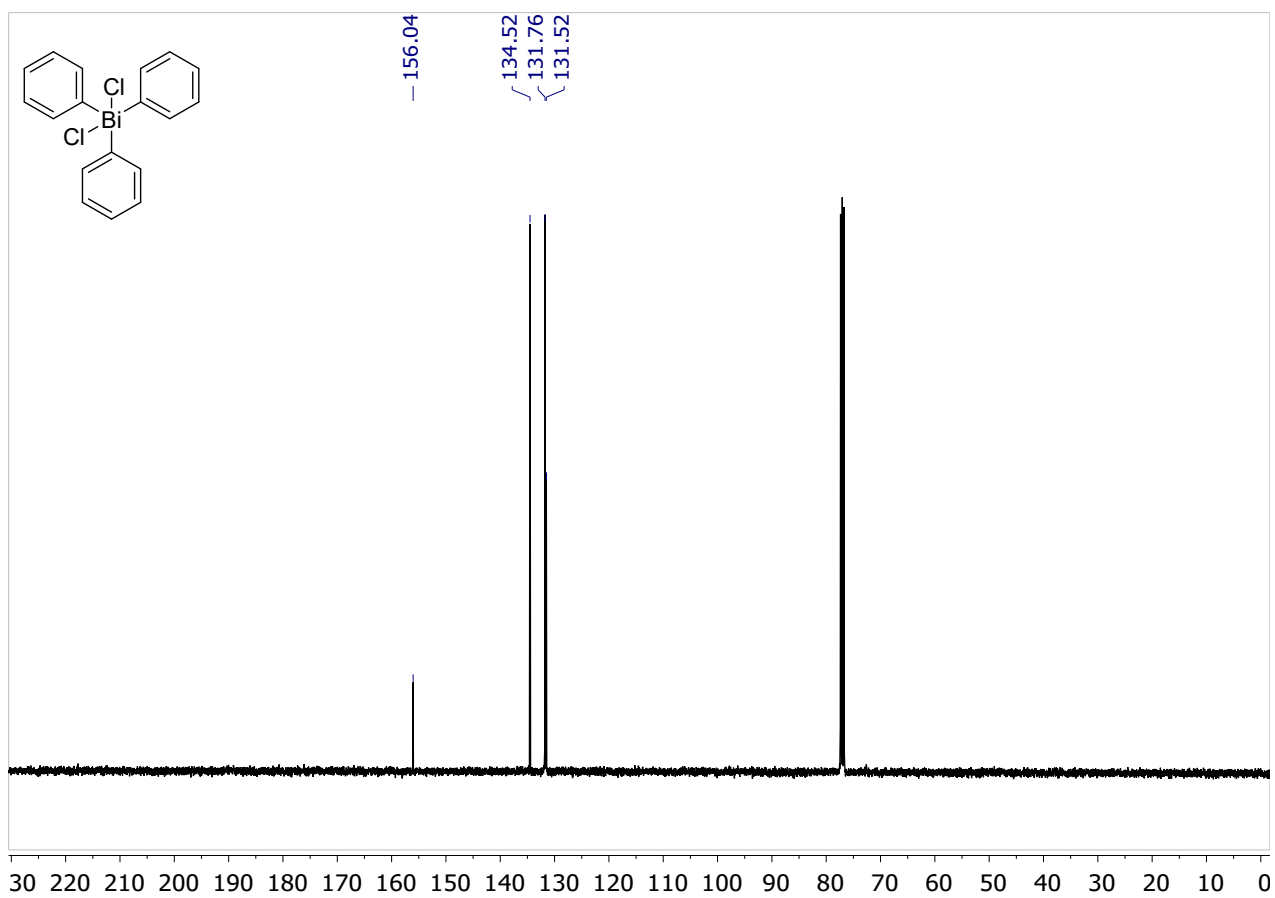

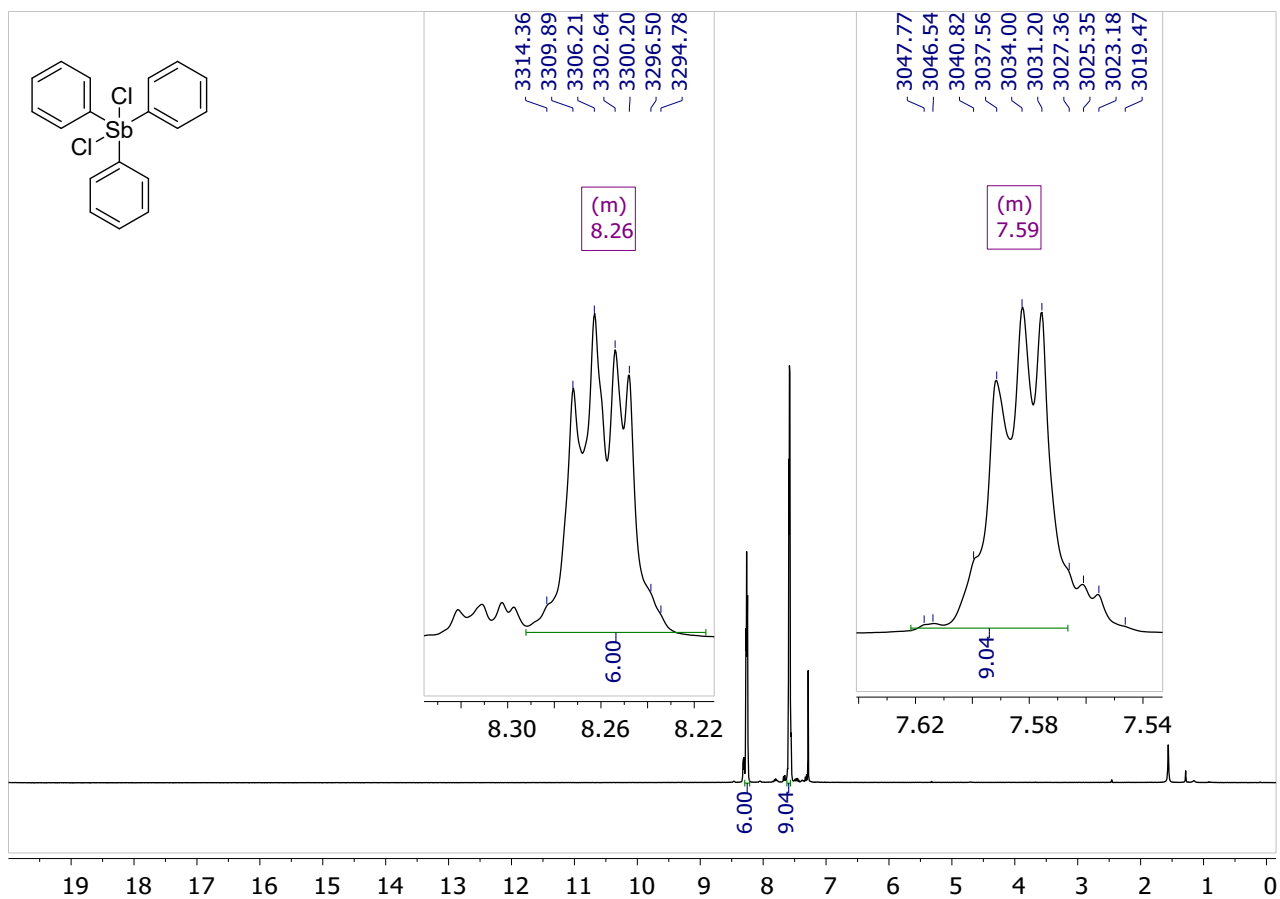

Figure S7:  $^1\text{H}$  NMR spectrum of 7 ( $\text{CDCl}_3$ , 400 MHz).

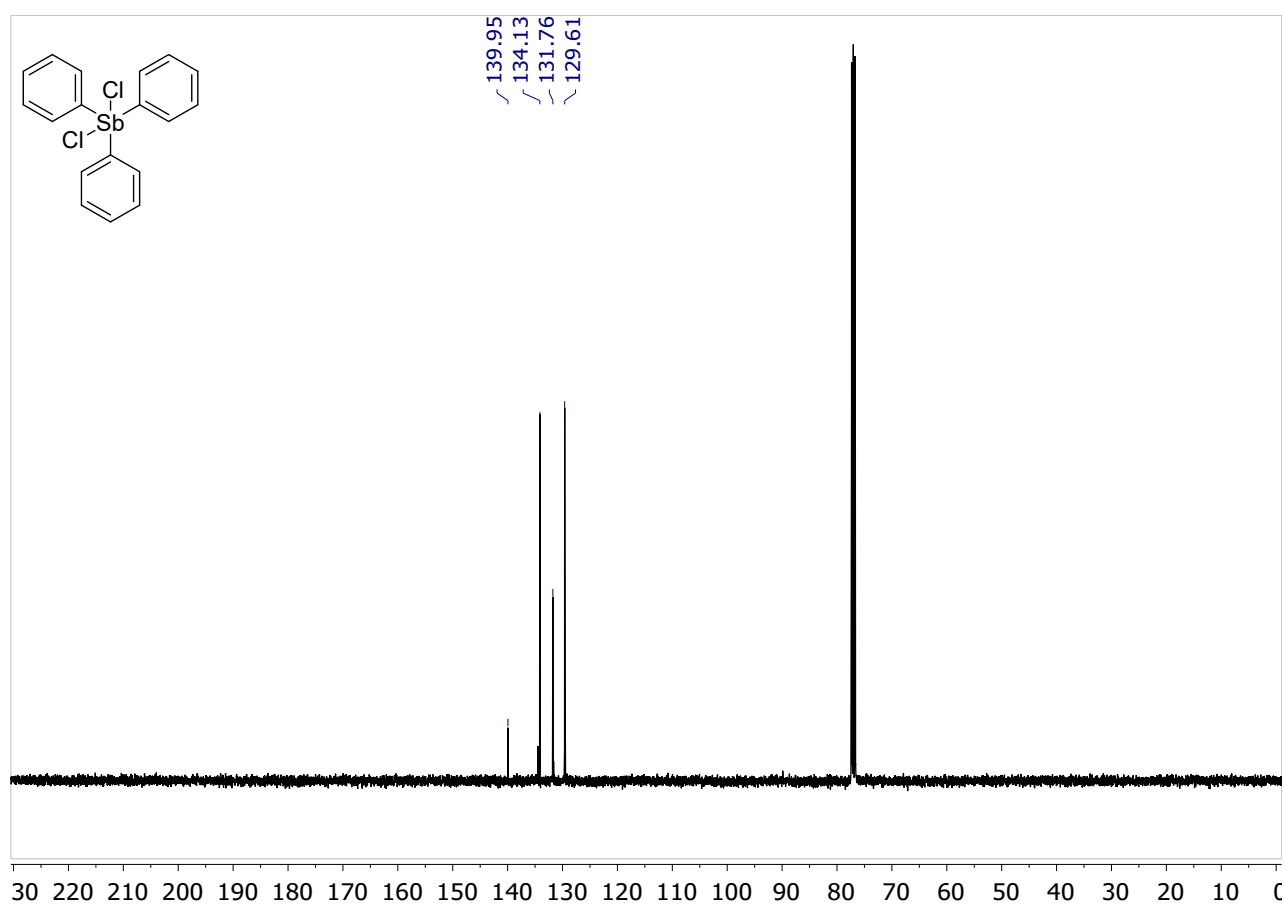

Figure S8:  $^{13}\text{C}\{^1\text{H}\}$  NMR spectrum of 7 ( $\text{CDCl}_3$ , 100 MHz).

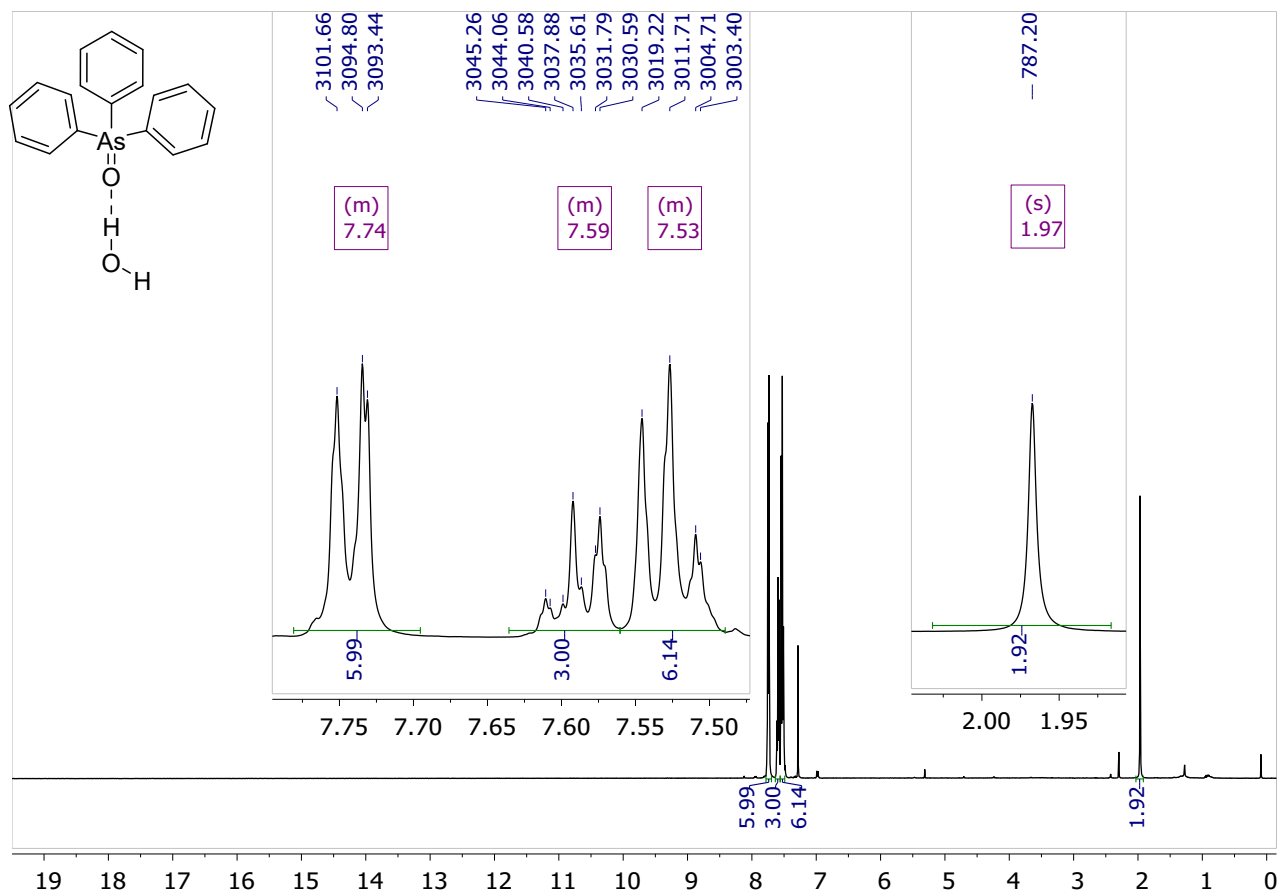

Figure S9: <sup>1</sup>H NMR spectrum of **8**·H<sub>2</sub>O (CDCl<sub>3</sub>, 400 MHz).

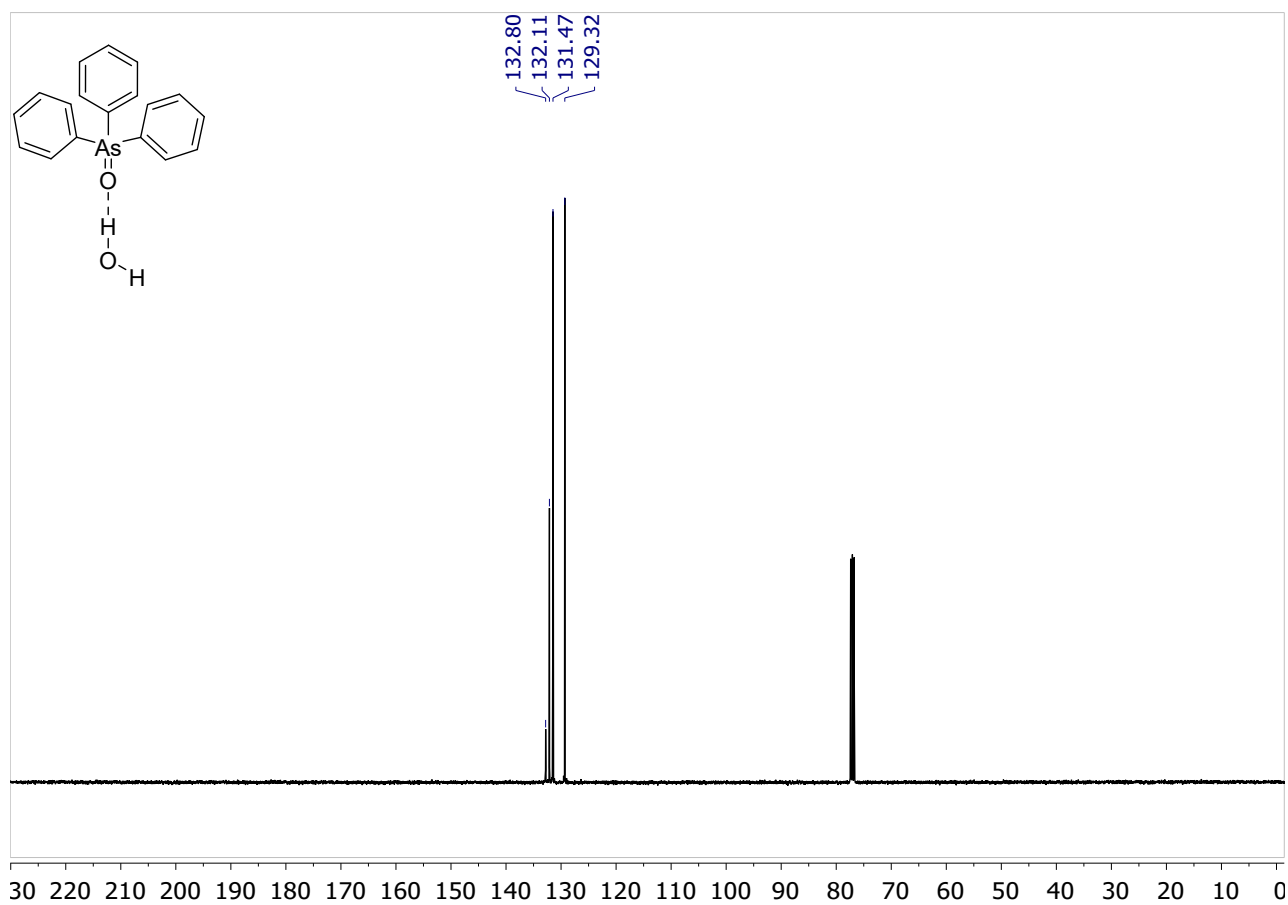

Figure S10: <sup>13</sup>C{<sup>1</sup>H} NMR spectrum of **8**·H<sub>2</sub>O (CDCl<sub>3</sub>, 100 MHz).

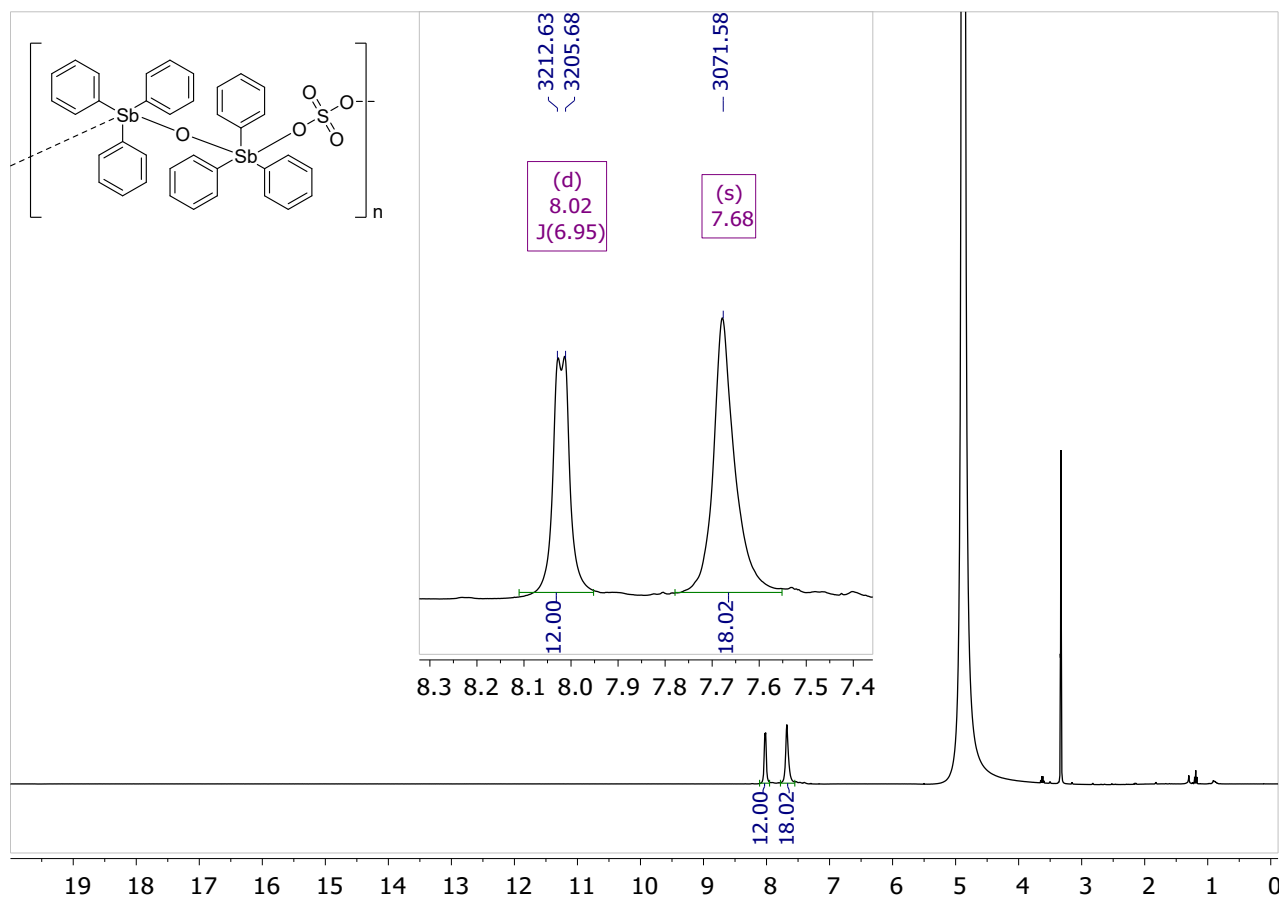

**Figure S11:**  $^1\text{H}$  NMR spectrum of **12** ( $\text{CD}_3\text{OH}$ , 400 MHz).

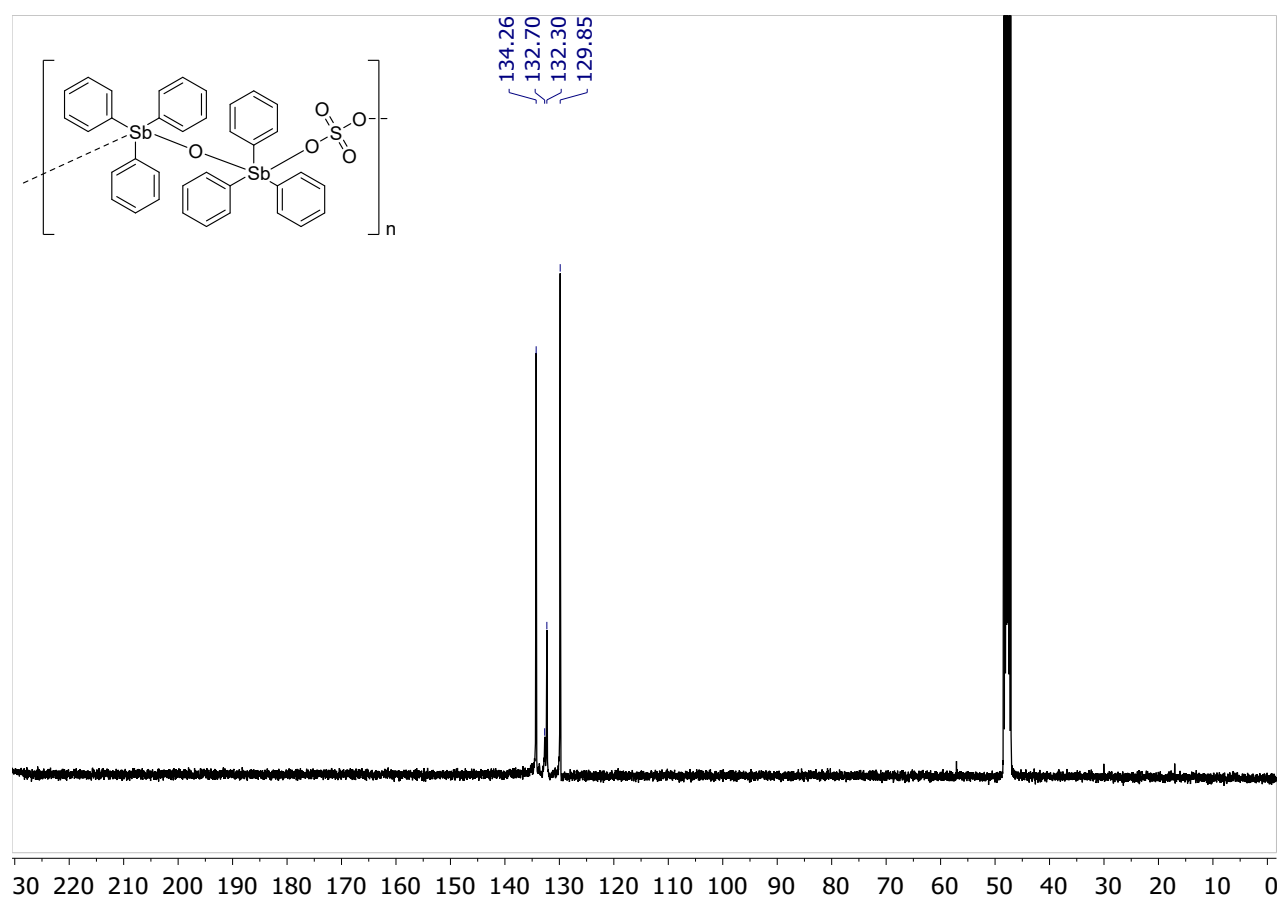

**Figure S12:**  $^{13}\text{C}\{^1\text{H}\}$  NMR spectrum of **12** ( $\text{CD}_3\text{OH}$ , 100 MHz).

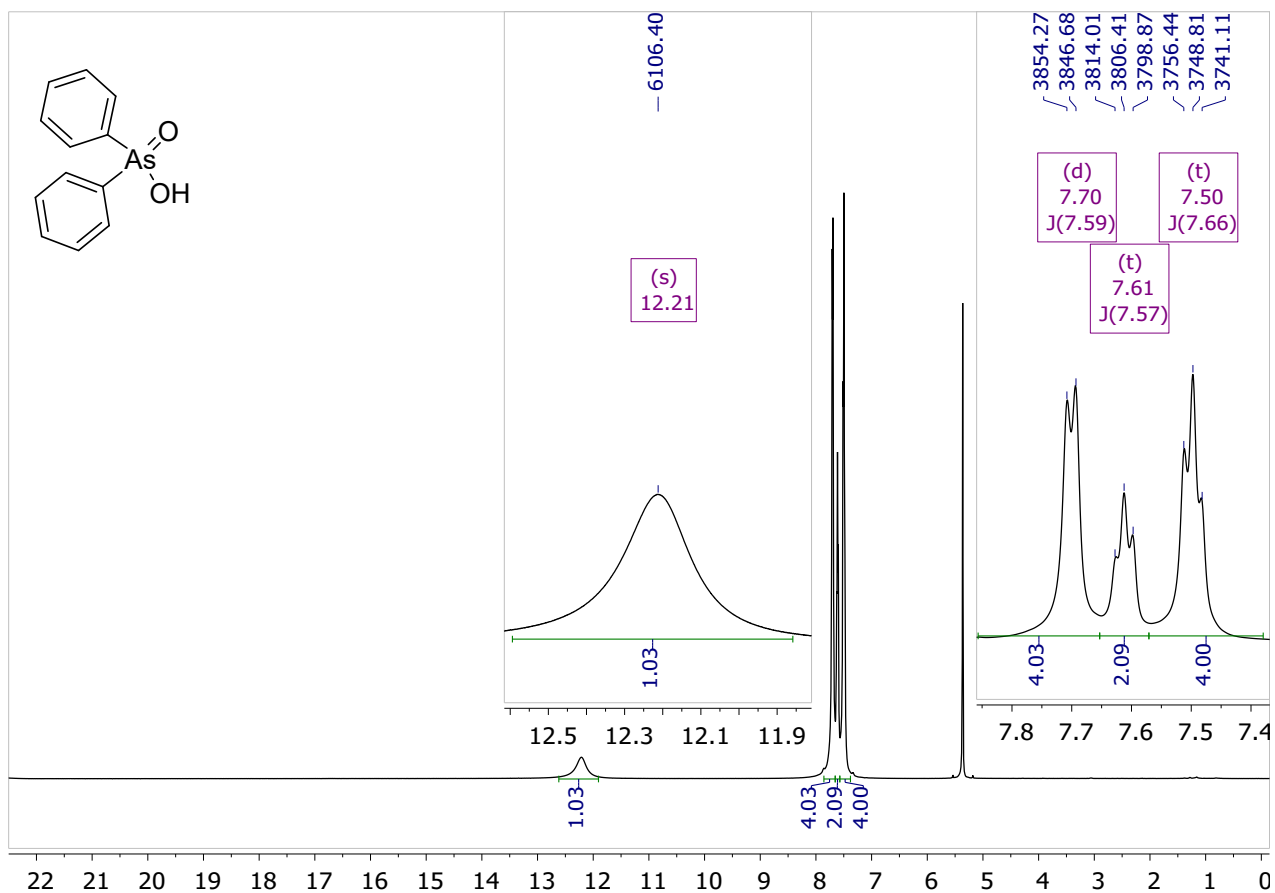

Figure S13:  $^1\text{H}$  NMR spectrum of **14** ( $\text{CD}_2\text{Cl}_2$ , 500 MHz, 180K).

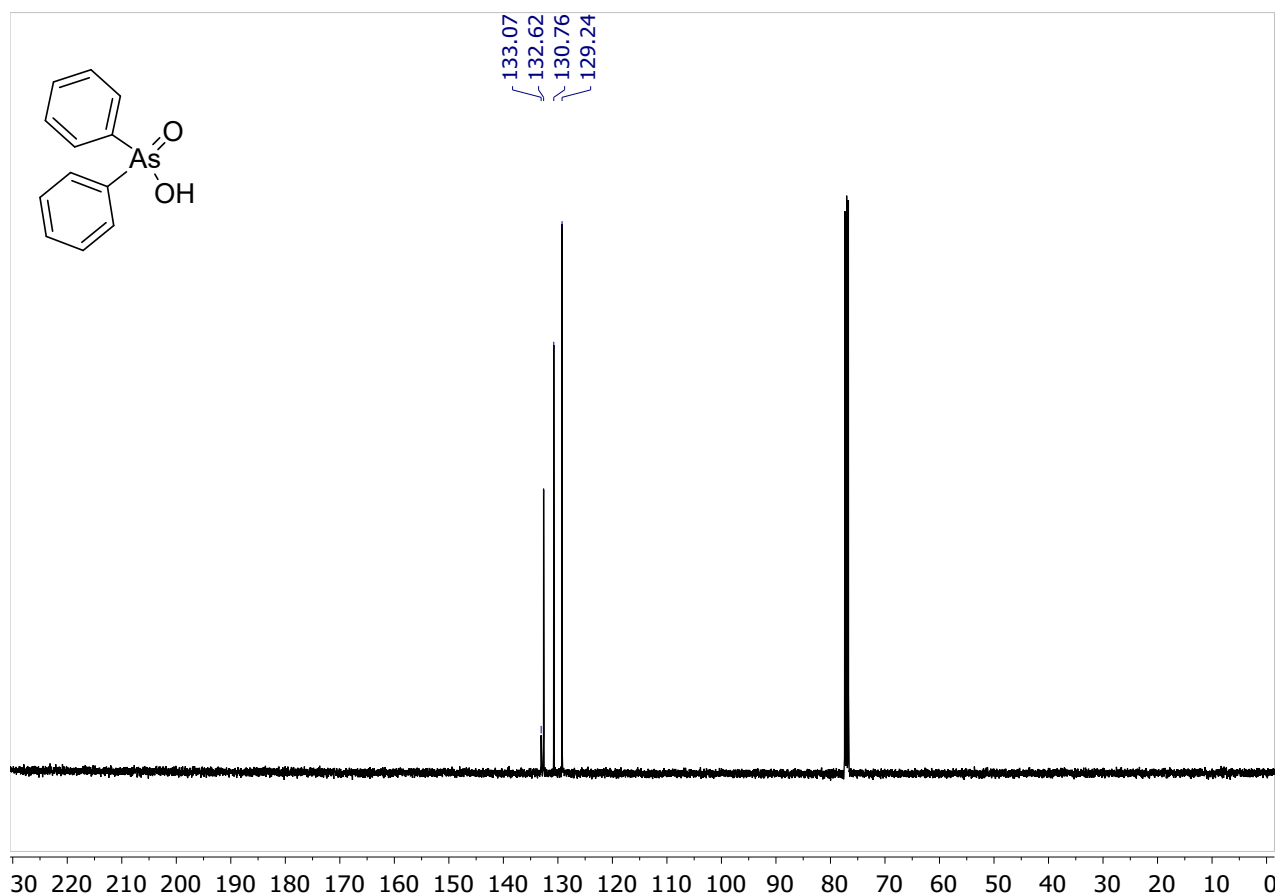

Figure S14:  $^{13}\text{C}\{^1\text{H}\}$  NMR spectrum of **14** ( $\text{CDCl}_3$ , 100 MHz).



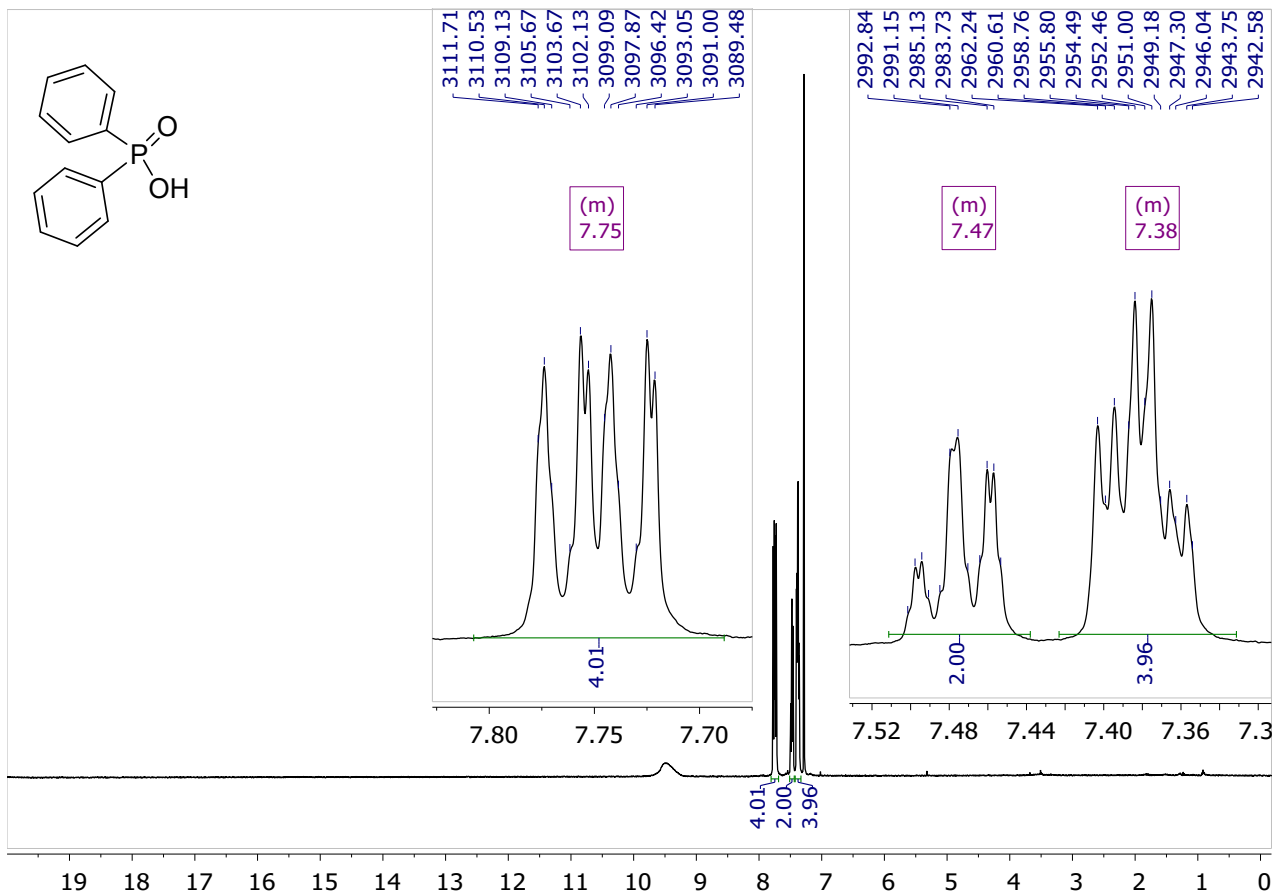

Figure S15: <sup>1</sup>H NMR spectrum of **15** (CDCl<sub>3</sub>, 400 MHz).

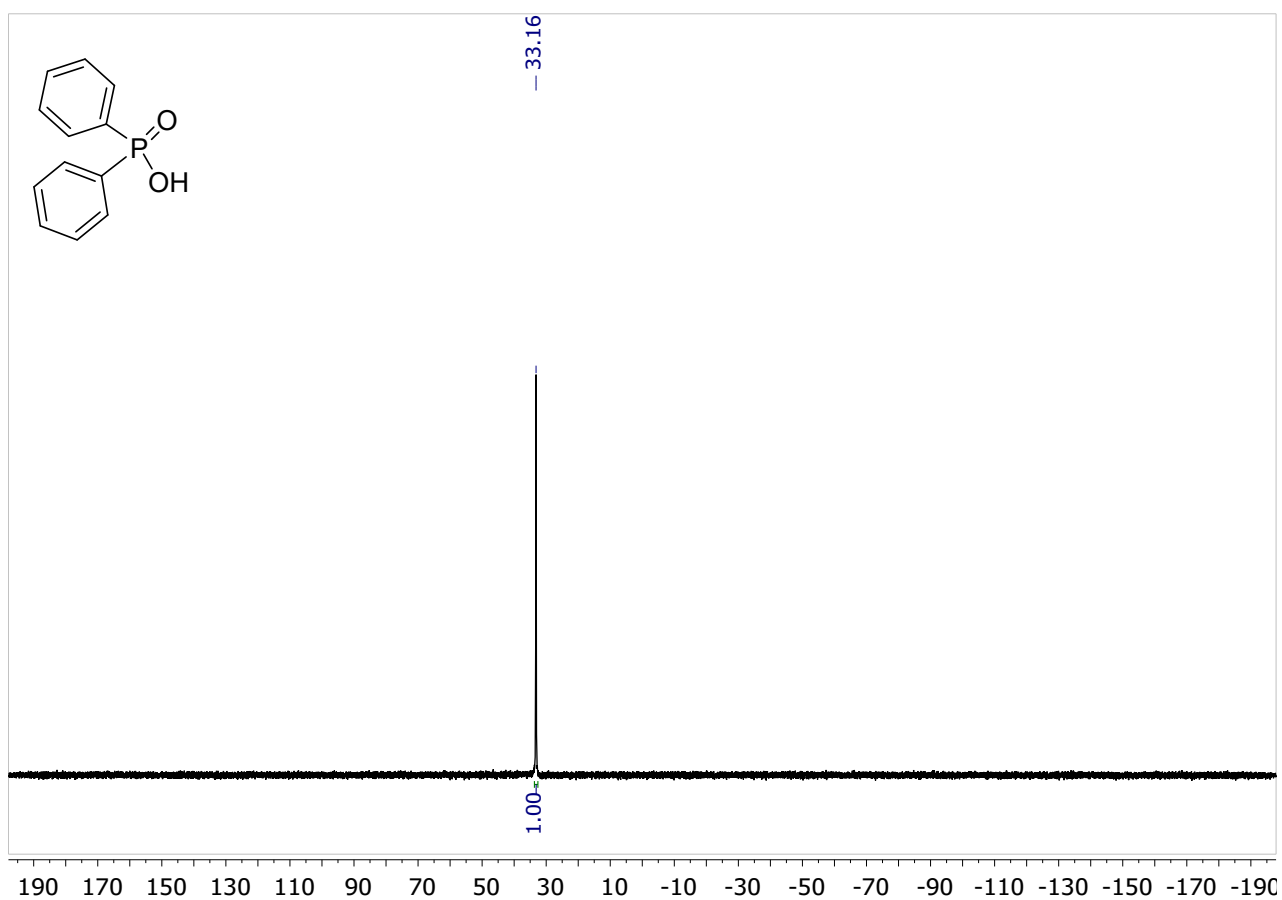

Figure S16: <sup>31</sup>P{<sup>1</sup>H} NMR spectrum of **15** (CDCl<sub>3</sub>, 162 MHz).

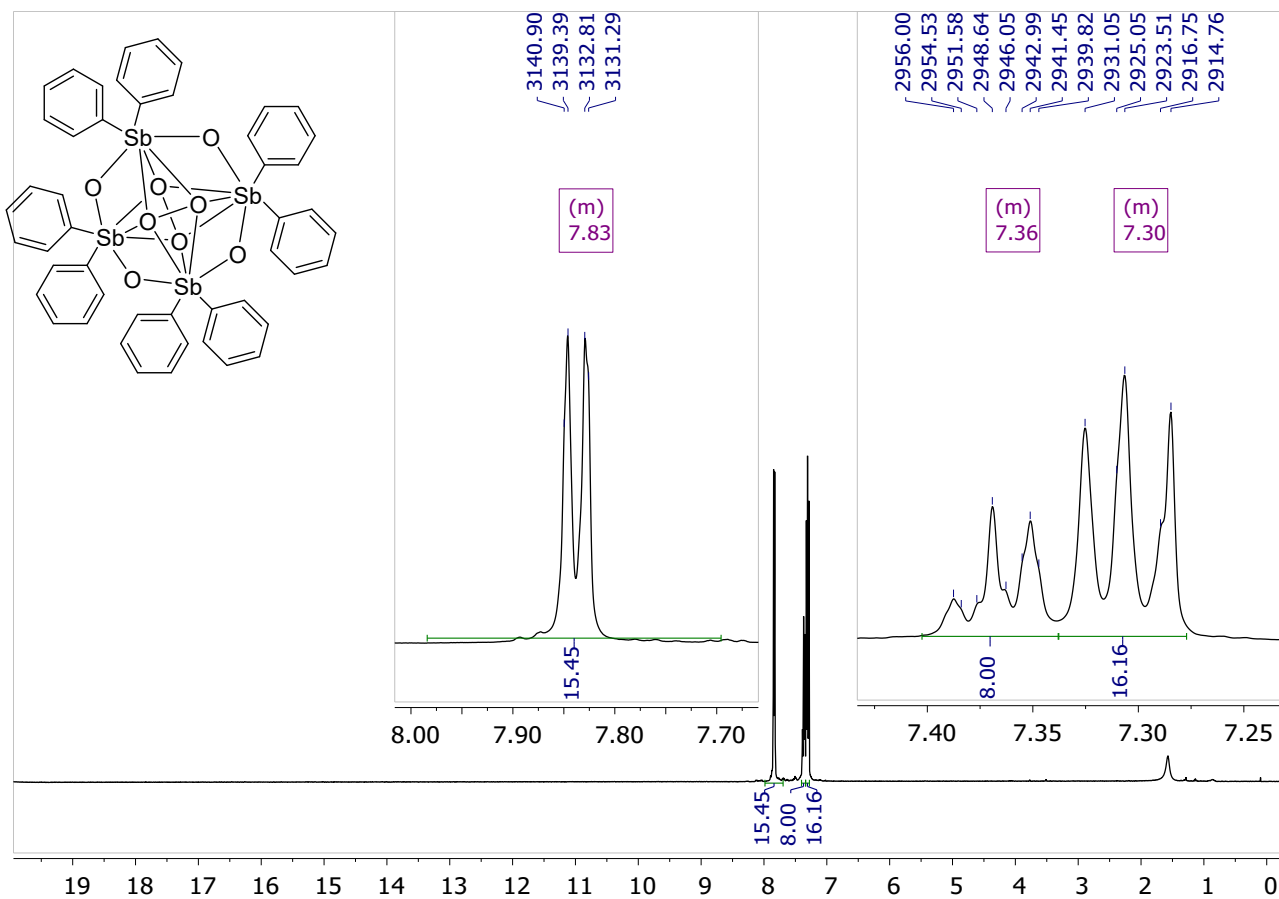

Figure S17:  $^1\text{H}$  NMR spectrum of **17** (CDCl<sub>3</sub>, 400 MHz).

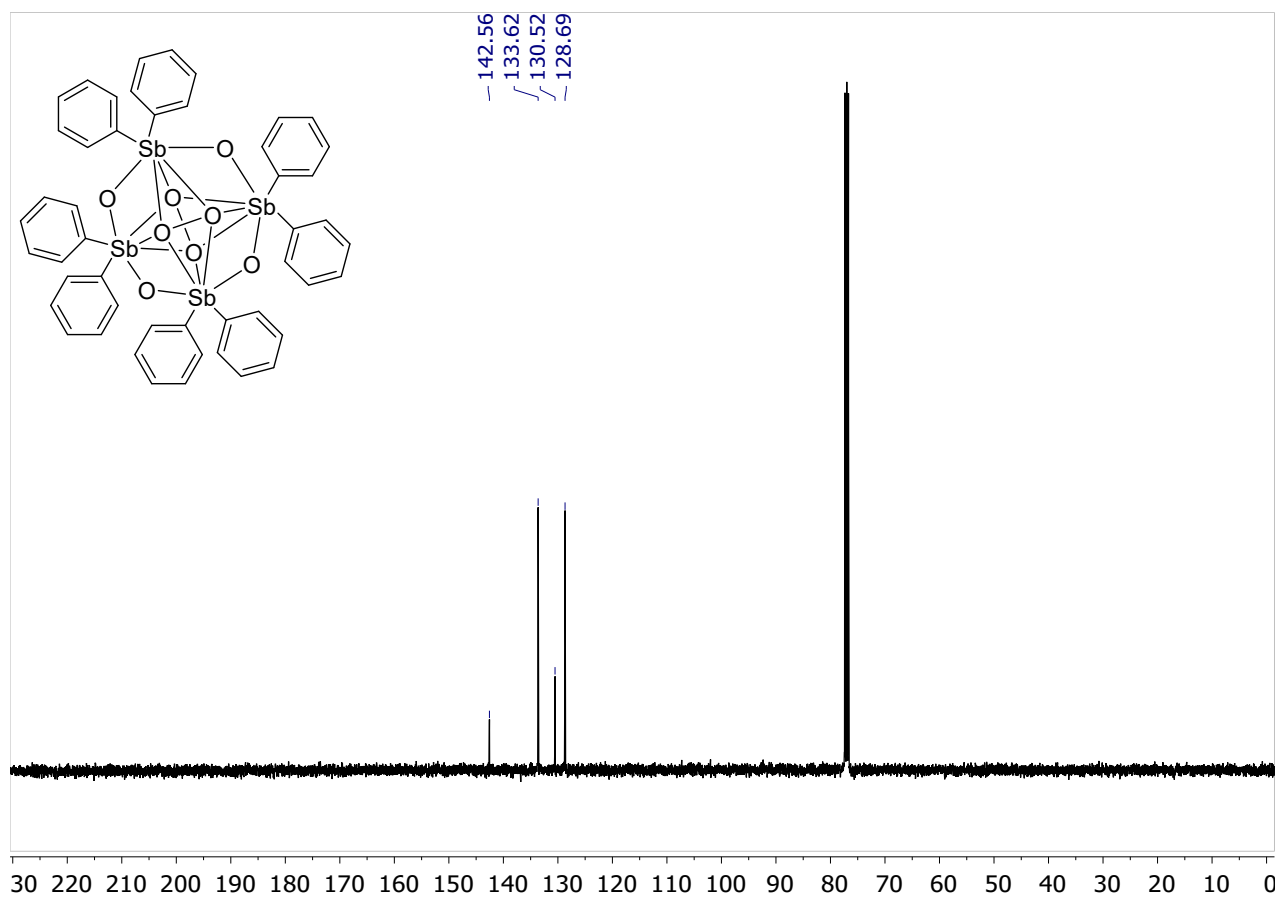

Figure S18:  $^{13}\text{C}\{^1\text{H}\}$  NMR spectrum of **17** (CDCl<sub>3</sub>, 100 MHz).

**Table S1.** Crystal data and structure refinement for  $(8 \cdot \text{H}_2\text{O})_2$ , **7-A**, **7-B**, **12**, **6**

| Identification code                                | $(8 \cdot \text{H}_2\text{O})_2$                                       | <b>7-A</b>                                                             | <b>7-B</b>                                                              | <b>12</b>                                                              | <b>6</b>                                                               |
|----------------------------------------------------|------------------------------------------------------------------------|------------------------------------------------------------------------|-------------------------------------------------------------------------|------------------------------------------------------------------------|------------------------------------------------------------------------|
| CCDC code                                          | 2114680                                                                | 2114672                                                                | 2114679                                                                 | 2114681                                                                | 2114673                                                                |
| Empirical formula                                  | $\text{C}_{18}\text{H}_{17}\text{AsO}_2$                               | $\text{C}_{18}\text{H}_{15}\text{Cl}_2\text{Sb}$                       | $\text{C}_{18}\text{H}_{15}\text{Cl}_2\text{Sb}$                        | $\text{C}_{36}\text{H}_{32}\text{O}_6\text{SSb}_2$                     | $\text{C}_{18}\text{H}_{15}\text{BiCl}_2$                              |
| Formula weight                                     | 340.23                                                                 | 423.95                                                                 | 423.95                                                                  | 836.17                                                                 | 511.18                                                                 |
| Temperature, K                                     | 100(1)                                                                 | 100.0(3)                                                               | 100.00(10)                                                              | 99.9(5)                                                                | 100.00(2)                                                              |
| Crystal system                                     | monoclinic                                                             | monoclinic                                                             | orthorhombic                                                            | monoclinic                                                             | orthorhombic                                                           |
| Space group                                        | $\text{P}2_1/\text{n}$                                                 | $\text{P}2_1/\text{c}$                                                 | $\text{Pbca}$                                                           | $\text{P}2_1/\text{c}$                                                 | $\text{P}2_12_12_1$                                                    |
| a, Å                                               | 9.4650(2)                                                              | 11.12210(10)                                                           | 13.01340(10)                                                            | 12.0623(2)                                                             | 9.1006(3)                                                              |
| b, Å                                               | 16.2211(3)                                                             | 9.41070(10)                                                            | 23.6265(2)                                                              | 14.7844(2)                                                             | 17.0456(4)                                                             |
| c, Å                                               | 11.0562(3)                                                             | 15.8718(2)                                                             | 43.3575(4)                                                              | 18.0122(2)                                                             | 22.1478(5)                                                             |
| $\alpha$ , °                                       | 90                                                                     | 90                                                                     | 90                                                                      | 90                                                                     | 90                                                                     |
| $\beta$ , °                                        | 113.710(3)                                                             | 95.1810(10)                                                            | 90                                                                      | 101.6130(10)                                                           | 90                                                                     |
| $\gamma$ , °                                       | 90                                                                     | 90                                                                     | 90                                                                      | 90                                                                     | 90                                                                     |
| Volume, Å <sup>3</sup>                             | 1554.21(7)                                                             | 1654.46(3)                                                             | 13330.7(2)                                                              | 3146.43(8)                                                             | 3435.68(16)                                                            |
| Z                                                  | 4                                                                      | 4                                                                      | 32                                                                      | 4                                                                      | 8                                                                      |
| $\rho_{\text{calc}}$ , g/cm <sup>3</sup>           | 1.454                                                                  | 1.702                                                                  | 1.690                                                                   | 1.765                                                                  | 1.977                                                                  |
| $\mu$ , mm <sup>-1</sup>                           | 2.188                                                                  | 16.104                                                                 | 15.989                                                                  | 14.626                                                                 | 10.565                                                                 |
| F(000)                                             | 696.0                                                                  | 832.0                                                                  | 6656.0                                                                  | 1656.0                                                                 | 1920.0                                                                 |
| Crystal size, mm <sup>3</sup>                      | 0.38 × 0.26 × 0.2                                                      | 0.08 × 0.06 × 0.04                                                     | 0.14 × 0.12 × 0.08                                                      | 0.07 × 0.04 × 0.02                                                     | 0.18 × 0.15 × 0.13                                                     |
| Radiation                                          | Mo K $\alpha$<br>( $\lambda = 0.71073$ )                               | Cu K $\alpha$<br>( $\lambda = 1.54184$ )                               | Cu K $\alpha$<br>( $\lambda = 1.54184$ )                                | Cu K $\alpha$<br>( $\lambda = 1.54184$ )                               | Mo K $\alpha$<br>( $\lambda = 0.71073$ )                               |
| 2 $\theta$ range for data collection, °            | 5.33 to 58.688                                                         | 7.982 to 134.984                                                       | 7.756 to 131.998                                                        | 7.482 to 134.978                                                       | 5.122 to 51.998                                                        |
| Index ranges                                       | -12 ≤ h ≤ 12,<br>-22 ≤ k ≤ 20,<br>-9 ≤ l ≤ 15                          | -13 ≤ h ≤ 11,<br>-11 ≤ k ≤ 11,<br>-19 ≤ l ≤ 18                         | -15 ≤ h ≤ 10,<br>-27 ≤ k ≤ 27,<br>-51 ≤ l ≤ 51                          | -14 ≤ h ≤ 14,<br>-16 ≤ k ≤ 17,<br>-21 ≤ l ≤ 21                         | -11 ≤ h ≤ 11,<br>-17 ≤ k ≤ 21,<br>-27 ≤ l ≤ 27                         |
| Reflections collected                              | 7334                                                                   | 19558                                                                  | 55699                                                                   | 21886                                                                  | 18050                                                                  |
| Independent reflections                            | 3598<br>[ $R_{\text{int}} = 0.0374$ ,<br>$R_{\text{sigma}} = 0.0570$ ] | 2985<br>[ $R_{\text{int}} = 0.0452$ ,<br>$R_{\text{sigma}} = 0.0294$ ] | 11598<br>[ $R_{\text{int}} = 0.0366$ ,<br>$R_{\text{sigma}} = 0.0248$ ] | 5645<br>[ $R_{\text{int}} = 0.0326$ ,<br>$R_{\text{sigma}} = 0.0292$ ] | 6672<br>[ $R_{\text{int}} = 0.0330$ ,<br>$R_{\text{sigma}} = 0.0385$ ] |
| Data/restraints/parameters                         | 3598/0/193                                                             | 2985/0/190                                                             | 11598/0/757                                                             | 5645/0/409                                                             | 6672/0/379                                                             |
| Goodness-of-fit on F <sup>2</sup>                  | 1.047                                                                  | 1.037                                                                  | 1.071                                                                   | 1.036                                                                  | 0.991                                                                  |
| Final R indexes [I ≥ 2 $\sigma$ (I)]               | $R_1 = 0.0369$ ,<br>$wR_2 = 0.0864$                                    | $R_1 = 0.0397$ , $wR_2 = 0.0974$                                       | $R_1 = 0.0240$ , $wR_2 = 0.0600$                                        | $R_1 = 0.0238$ , $wR_2 = 0.0609$                                       | $R_1 = 0.0203$ ,<br>$wR_2 = 0.0361$                                    |
| Final R indexes [all data]                         | $R_1 = 0.0474$ ,<br>$wR_2 = 0.0935$                                    | $R_1 = 0.0421$ , $wR_2 = 0.0995$                                       | $R_1 = 0.0267$ , $wR_2 = 0.0618$                                        | $R_1 = 0.0264$ , $wR_2 = 0.0622$                                       | $R_1 = 0.0245$ ,<br>$wR_2 = 0.0370$                                    |
| Largest diff. peak/hole, e $\cdot$ Å <sup>-3</sup> | 0.95/-0.56                                                             | 2.63/-1.79                                                             | 0.91/-0.69                                                              | 0.47/-1.06                                                             | 0.83/-0.62                                                             |
| Flack parameter                                    | -                                                                      | -                                                                      | -                                                                       | -                                                                      | -0.031(4)                                                              |

**Table S2.** Crystal data and structure refinement for **8<sub>2</sub>·(4-MeC<sub>6</sub>H<sub>5</sub>SO<sub>2</sub>NH<sub>2</sub>)<sub>3</sub>, 15, 14-A, 14-B, 17**

| Identification code                        | <b>8<sub>2</sub>·(4-MeC<sub>6</sub>H<sub>5</sub>SO<sub>2</sub>NH<sub>2</sub>)<sub>3</sub></b> | <b>15</b>                                                           | <b>14-A</b>                                                         | <b>14-B</b>                                                         | <b>17</b>                                                                      |
|--------------------------------------------|-----------------------------------------------------------------------------------------------|---------------------------------------------------------------------|---------------------------------------------------------------------|---------------------------------------------------------------------|--------------------------------------------------------------------------------|
| CCDC code                                  | 2114676                                                                                       | 2114677                                                             | 2114675                                                             | 2114674                                                             | 2114678                                                                        |
| Empirical formula                          | C <sub>57</sub> H <sub>57</sub> As <sub>2</sub> N <sub>3</sub> O <sub>8</sub> S <sub>3</sub>  | C <sub>12</sub> H <sub>11</sub> O <sub>2</sub> P                    | C <sub>12</sub> H <sub>11</sub> AsO <sub>2</sub>                    | C <sub>12</sub> H <sub>11</sub> AsO <sub>2</sub>                    | C <sub>50</sub> H <sub>42</sub> Cl <sub>6</sub> O <sub>8</sub> Sb <sub>4</sub> |
| Formula weight                             | 1158.07                                                                                       | 218.18                                                              | 262.13                                                              | 262.13                                                              | 1470.53                                                                        |
| Temperature, K                             | 100.1(3)                                                                                      | 100.0(3)                                                            | 100.00(10)                                                          | 100(2)                                                              | 100.0(2)                                                                       |
| Crystal system                             | trigonal                                                                                      | monoclinic                                                          | monoclinic                                                          | monoclinic                                                          | monoclinic                                                                     |
| Space group                                | R-3                                                                                           | P2 <sub>1</sub> /c                                                  | P2 <sub>1</sub> /c                                                  | P2 <sub>1</sub> /c                                                  | C2/c                                                                           |
| a, Å                                       | 18.7709(2)                                                                                    | 11.4435(3)                                                          | 11.4506(4)                                                          | 16.0104(3)                                                          | 22.9804(2)                                                                     |
| b, Å                                       | 18.7709(2)                                                                                    | 5.9428(2)                                                           | 6.0251(2)                                                           | 22.3412(6)                                                          | 13.64820(10)                                                                   |
| c, Å                                       | 26.6661(3)                                                                                    | 15.6087(4)                                                          | 15.7851(4)                                                          | 6.16130(10)                                                         | 35.9388(3)                                                                     |
| α, °                                       | 90                                                                                            | 90                                                                  | 90                                                                  | 90                                                                  | 90                                                                             |
| β, °                                       | 90                                                                                            | 100.199(2)                                                          | 99.389(3)                                                           | 90.009(2)                                                           | 112.5390(10)                                                                   |
| γ, °                                       | 120                                                                                           | 90                                                                  | 90                                                                  | 90                                                                  | 90                                                                             |
| Volume, Å <sup>3</sup>                     | 8136.9(2)                                                                                     | 1044.72(5)                                                          | 1074.44(6)                                                          | 2203.84(8)                                                          | 10410.92(16)                                                                   |
| Z                                          | 6                                                                                             | 4                                                                   | 4                                                                   | 8                                                                   | 8                                                                              |
| ρ <sub>calc</sub> , g/cm <sup>3</sup>      | 1.418                                                                                         | 1.387                                                               | 1.620                                                               | 1.580                                                               | 1.876                                                                          |
| μ, mm <sup>-1</sup>                        | 3.068                                                                                         | 2.134                                                               | 4.089                                                               | 3.987                                                               | 19.548                                                                         |
| F(000)                                     | 3588.0                                                                                        | 456.0                                                               | 528.0                                                               | 1056.0                                                              | 5696.0                                                                         |
| Crystal size, mm <sup>3</sup>              | 0.16 × 0.12 × 0.1                                                                             | 0.1 × 0.06 × 0.04                                                   | 0.1 × 0.06 × 0.03                                                   | 0.16 × 0.06 × 0.05                                                  | 0.22 × 0.2 × 0.08                                                              |
| Radiation                                  | Cu Kα<br>(λ = 1.54184)                                                                        | Cu Kα<br>(λ = 1.54184)                                              | Cu Kα<br>(λ = 1.54184)                                              | Cu Kα<br>(λ = 1.54184)                                              | Cu Kα<br>(λ = 1.54184)                                                         |
| 2θ range for data collection, °            | 6.368 to 134.944                                                                              | 7.85 to 134.95                                                      | 7.826 to 154.5                                                      | 5.52 to 131.95                                                      | 5.324 to 136.224                                                               |
| Index ranges                               | -19 ≤ h ≤ 13,<br>-18 ≤ k ≤ 22,<br>-30 ≤ l ≤ 31                                                | -13 ≤ h ≤ 13,<br>-6 ≤ k ≤ 7,<br>-18 ≤ l ≤ 18                        | -14 ≤ h ≤ 14,<br>-7 ≤ k ≤ 7,<br>-14 ≤ l ≤ 19                        | -18 ≤ h ≤ 12,<br>-24 ≤ k ≤ 26,<br>-7 ≤ l ≤ 7                        | -27 ≤ h ≤ 27,<br>-16 ≤ k ≤ 16,<br>-39 ≤ l ≤ 43                                 |
| Reflections collected                      | 5621                                                                                          | 4553                                                                | 11093                                                               | 16170                                                               | 28825                                                                          |
| Independent reflections                    | 3183<br>[R <sub>int</sub> = 0.0688,<br>R <sub>sigma</sub> = 0.0555]                           | 1876<br>[R <sub>int</sub> = 0.0264,<br>R <sub>sigma</sub> = 0.0336] | 2233<br>[R <sub>int</sub> = 0.0398,<br>R <sub>sigma</sub> = 0.0297] | 3801<br>[R <sub>int</sub> = 0.0358,<br>R <sub>sigma</sub> = 0.0312] | 9385<br>[R <sub>int</sub> = 0.0469,<br>R <sub>sigma</sub> = 0.0386]            |
| Data/restraints/parameters                 | 3183/0/227                                                                                    | 1876/0/137                                                          | 2233/0/140                                                          | 3801/0/279                                                          | 9385/0/607                                                                     |
| Goodness-of-fit on F <sup>2</sup>          | 1.083                                                                                         | 1.045                                                               | 1.194                                                               | 1.036                                                               | 1.053                                                                          |
| Final R indexes [I ≥ 2σ (I)]               | R <sub>1</sub> = 0.0575, wR <sub>2</sub> = 0.1591                                             | R <sub>1</sub> = 0.0344, wR <sub>2</sub> = 0.0880                   | R <sub>1</sub> = 0.0295, wR <sub>2</sub> = 0.0813                   | R <sub>1</sub> = 0.0308, wR <sub>2</sub> = 0.0834                   | R <sub>1</sub> = 0.0348, wR <sub>2</sub> = 0.0902                              |
| Final R indexes [all data]                 | R <sub>1</sub> = 0.0593, wR <sub>2</sub> = 0.1629                                             | R <sub>1</sub> = 0.0388, wR <sub>2</sub> = 0.0912                   | R <sub>1</sub> = 0.0311, wR <sub>2</sub> = 0.0821                   | R <sub>1</sub> = 0.0343, wR <sub>2</sub> = 0.0864                   | R <sub>1</sub> = 0.0363, wR <sub>2</sub> = 0.0914                              |
| Largest diff. peak/hole, e·Å <sup>-3</sup> | 1.28/-0.90                                                                                    | 0.38/-0.34                                                          | 0.47/-0.74                                                          | 0.56/-0.48                                                          | 1.52/-1.44                                                                     |
| Flack parameter                            | -                                                                                             | -                                                                   | -                                                                   | -                                                                   | -                                                                              |
